# Supplementary material
Source: publisher figshare collection journal article supplement (https://brill.figshare.com/ndownloader/files/25633304)
Supplement: Supplementary file 1 [file 25633304]

**SUPPLEMENTARY TABLES**

Table AI

*Portunus segnis* (Forskål, 1775): numbers of male and female crabs vs. sex ratio during the period of the present study

| Table analysed | |  | | |  |  |
| --- | --- | --- | --- | --- | --- | --- |
| Sex ratio |  |  | | |  |  |
| One-way analysis of variance | | | | |  |  |
| *P* value | | | *P*<0.0001 |  |  |  |
| *P* value summary | | | *** |  |  |  |
| Are means significantly different? (*P* < 0.05) | | | Yes |  |  |  |
| Number of groups | | | 4 |  |  |  |
| *F* | | | 33.73 |  |  |  |
| *R*2 | | | 0.8940 |  |  |  |
|  | | |  |  |  |  |
| ANOVA Table | | | SS | df | MS |  |
| Treatment (between columns) | | | 14250 | 3 | 4749 |  |
| Residual (within columns) | | | 1690 | 12 | 140.8 |  |
| Total | | | 15940 | 15 |  |  |
|  | | |  |  |  |  |
| Tukey's Multiple Comparison Test | | | Mean Diff. | q | *P* value | 95% CI of diff |
| No. Males vs no. Females | | | -6.500 | 1.096 | *P* > 0.05 | -31.41 to 18.41 |
| Sex ratio males vs Sex ratio females | | | -0.05500 | 0.009270 | *P* > 0.05 | -24.97 to 24.86 |

Table AII

*Portunus segnis* (Forskål, 1775): average values of the carapace length and width of male and female crabs

| Table analysed | |  | |  |  |
| --- | --- | --- | --- | --- | --- |
| Carapace length and width | |  | |  |  |
| One-way analysis of variance | | | |  |  |
| *P* value | 0.0002 | |  |  |  |
| *P* value summary | *** | |  |  |  |
| Are means significantly different? (*P* < 0.05) | Yes | |  |  |  |
| Number of groups | 4 | |  |  |  |
| *F* | 15.93 | |  |  |  |
| *R*2 | 0.7993 | |  |  |  |
|  |  | |  |  |  |
| ANOVA Table | SS | | df | MS |  |
| Treatment (between columns) | 122.5 | | 3 | 40.82 |  |
| Residual (within columns) | 30.75 | | 12 | 2.563 |  |
| Total | 153.2 | | 15 |  |  |
|  |  | |  |  |  |
| Tukey's Multiple Comparison Test | Mean Diff. | | *q* | *P* value | 95% CI of diff |
| CL (cm) males vs CL (cm) females | -1.025 | | 1.281 | *P* > 0.05 | -4.386 to 2.336 |
| CL (cm) males vs CW (cm) males | -5.400 | | 6.747 | *P* < 0.01 | -8.761 to -2.039 |
| CL (cm) females vs CW (cm) females | -5.462 | | 6.825 | *P* < 0.01 | -8.823 to -2.102 |
| CW (cm) males vs CW (cm) females | -1.088 | | 1.359 | *P* > 0.05 | -4.448 to 2.273 |
